# Supplementary material
Source: bioRxiv or medRxiv preprint supplement (https://www.biorxiv.org/highwire/filestream/73102/field_highwire_adjunct_files/0/238808-1.pdf)
Supplement: Supplementary file [file 238808-1.pdf]

Hybrid correction of highly noisy Oxford  
Nanopore long reads using a variable-order de  
Bruijn graph

**SUPPLEMENTARY MATERIAL**

Pierre Morisse<sup>1</sup>, Thierry Lecroq<sup>1</sup> and Arnaud Lefebvre<sup>1</sup>

<sup>1</sup>Normandie Univ, UNIROUEN, LITIS, 76000 Rouen, France

| Dataset                     | <i>A. baylyi</i>       | <i>E. coli</i>           | <i>S. cerevisiae</i>      | <i>C. elegans</i>       |
|-----------------------------|------------------------|--------------------------|---------------------------|-------------------------|
| <b>Reference organism</b>   |                        |                          |                           |                         |
| Strain                      | ADP1                   | K-12 substr. MG1655      | W303                      | Bristol N2              |
| Reference sequence          | CR543861               | NC_000913                | scf718000000{084-13}      | GCA_000002985.3         |
| Genome size                 | 3.6 Mbp                | 4.6 Mbp                  | 12.2 Mbp                  | 100 Mbp                 |
| <b>Oxford Nanopore data</b> |                        |                          |                           |                         |
| Accession number            | ERR77685{1-5}          | Genoscope <sup>2</sup>   | Genoscope <sup>3</sup>    | ERR1802061 <sup>4</sup> |
|                             | Genoscope <sup>1</sup> | Sequences from Loman Lab | Sequences from Schatz Lab |                         |
| Number of reads             | 89,011                 | 22,270                   | 205,923                   | 363,500                 |
| Average length              | 4,284                  | 5,999                    | 5,698                     | 5,524                   |
| Number of bases             | 381 Mbp                | 134 Mbp                  | 1,173 Mbp                 | 2,008 Mbp               |
| Coverage                    | 106x                   | 29x                      | 96x                       | 20x                     |
| <b>Illumina data</b>        |                        |                          |                           |                         |
| Accession number            | ERR788913 <sup>4</sup> | Genoscope <sup>5</sup>   | Genoscope <sup>6</sup>    | ART                     |
|                             |                        | Sequences from Loman Lab | Sequences from Schatz Lab |                         |
| Number of reads             | 900,000                | 775,500                  | 2,500,000                 | 20,057,100              |
| Read length                 | 250                    | 300                      | 250                       | 250                     |
| Number of bases             | 224 Mbp                | 232 Mbp                  | 625 Mbp                   | 5,000 Mbp               |
| Coverage                    | 50x                    | 50x                      | 50x                       | 50x                     |

Table 1: Description of the data used in the experiments.

<sup>1</sup><http://www.genoscope.cns.fr/externe/nas/datasets/MinION/acineto/>, reads from run6.

<sup>2</sup><http://www.genoscope.cns.fr/externe/nas/datasets/MinION/ecoli/>

<sup>3</sup><http://www.genoscope.cns.fr/externe/nas/datasets/MinION/yeast/>

<sup>4</sup>Only a subset of the data was used.

<sup>5</sup><http://www.genoscope.cns.fr/externe/nas/datasets/Illumina/ecoli/>

<sup>6</sup><http://www.genoscope.cns.fr/externe/nas/datasets/Illumina/yeast/>

| Pre-processing        | QuorUM | Karect |
|-----------------------|--------|--------|
| <i>A. baylyi</i>      |        |        |
| Number of reads       | 16,618 | 16,618 |
| Split reads (%)       | 4.90   | 4.86   |
| Average length        | 10,260 | 10,260 |
| Number of bases (Mbp) | 179    | 179    |
| Average identity (%)  | 99.40  | 99.40  |
| Genome coverage (%)   | 99.82  | 99.80  |
| <i>E. coli</i>        |        |        |
| Number of reads       | 21,005 | 21,006 |
| Split reads (%)       | 4.98   | 4.88   |
| Average length        | 5,797  | 5,794  |
| Number of bases (Mbp) | 128    | 128    |
| Average identity (%)  | 99.81  | 99.81  |
| Genome coverage (%)   | 99.43  | 99.41  |
| <i>S. cerevisiae</i>  |        |        |
| Number of reads       | 33,484 | 33,250 |
| Split reads (%)       | 11.47  | 10.55  |
| Average length        | 6,455  | 6,613  |
| Number of bases (Mbp) | 243    | 244    |
| Average identity (%)  | 99.54  | 99.55  |
| Genome coverage (%)   | 93.32  | 93.19  |

Table 2: Comparison of the results obtained with Jabba, when correcting the short with QuorUM or with Karect.

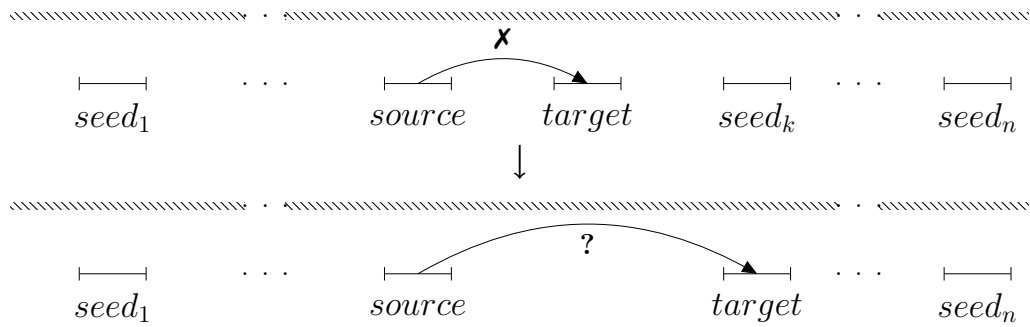

Figure 1: Illustration of the process of skipping a seed. Hatched lines represent the long read and segments represent the seeds. Top: No path allowing to link  $source$  to  $target$  has been found.  $target$  is thus considered as erroneous and is ignored. Bottom:  $target$  is redefined as  $seed_k$ , whereas  $source$  remains unchanged. A new linking iteration is then performed between these two seeds.

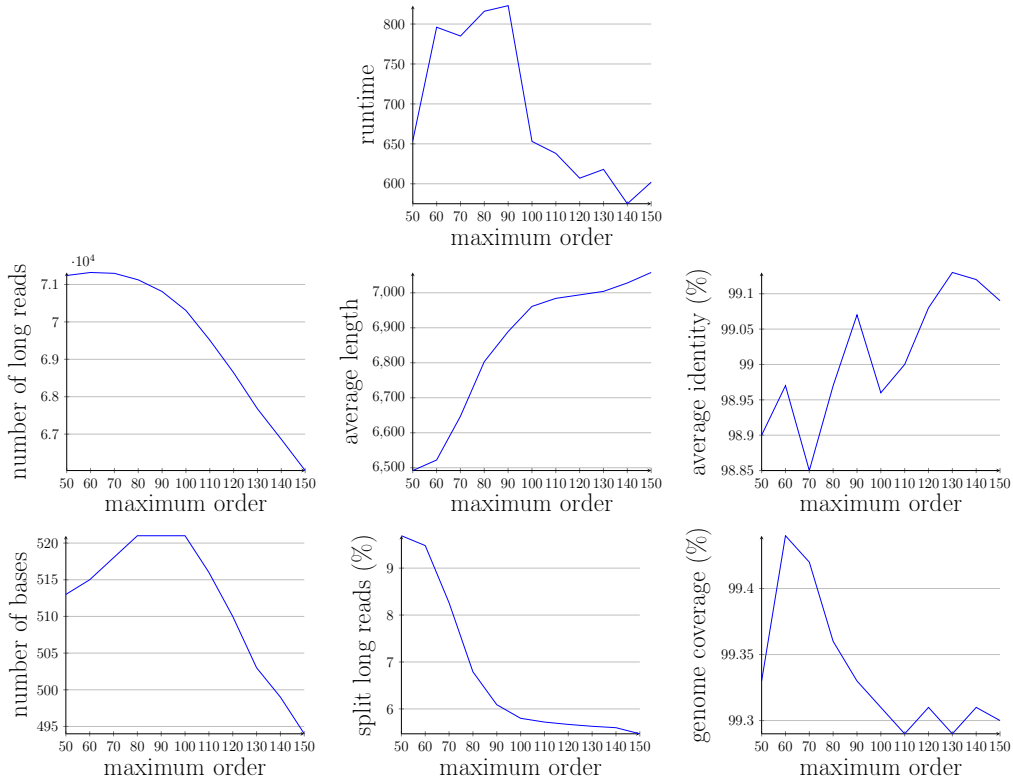

Figure 2: Impact of the maximum order of the graph on the results, when fixing other parameters. To obtain fair comparisons, the minimum order of the graph was set to half of the maximum order for each experiment. Runtimes are reported for the execution of the whole correction pipeline. We acknowledge that a maximum order of 100 yields shorter reads, displaying a lower identity than higher orders, but as higher orders correct less long reads, setting the maximum order to 100 offers a good compromise. Same goes for lower orders correcting more long reads, and yielding a higher coverage of the reference genome, but displaying longer runtimes, and higher proportions of split long reads.

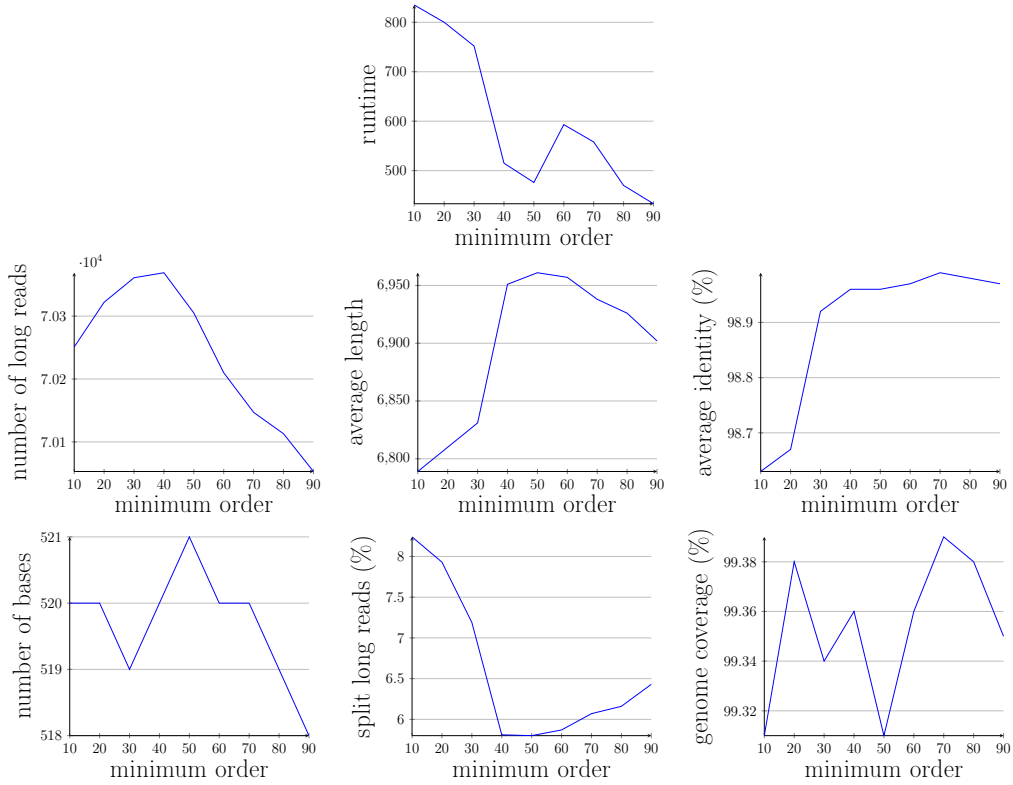

Figure 3: Impact of the minimum order of the graph on the results, when fixing other parameters. Rutimes are reported for the execution of the seeds linking and tips extension steps only. The fact that a minimum order of 50 covers the reference genome slightly less than other orders comes from the fact it displays the lowest proportion of split long reads, and therefore avoids spurious mappings of long reads fragments in wrong regions. A minimum order of 50 was chosen over 40, as, even though the two values display close statistics, a minimum order of 50 allows to produce longer, less split long reads, correct more bases, and run in a shorter time, despite correcting slightly less long reads.

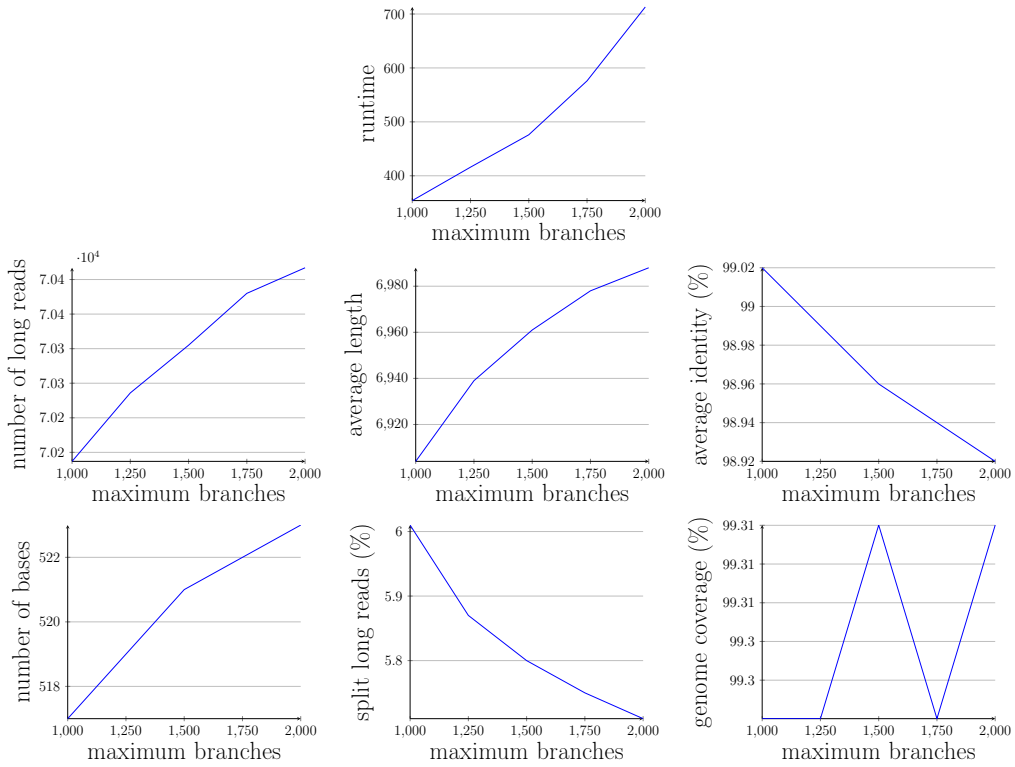

Figure 4: Impact of the maximum number of branches explorations on the results, when fixing other parameters. Runtimes are reported for the execution of the seeds linking and tips extension steps only.
